# Supplementary material for: Calmodulin Domain Protein Kinase PiCDPK1 Regulates Pollen Tube Growth Polarity through Interaction with RhoGDI
Source: MDPI journal article supplement (doi:10.3390/plants11030254), 2022-01-19
Supplement: s1 [file s1]

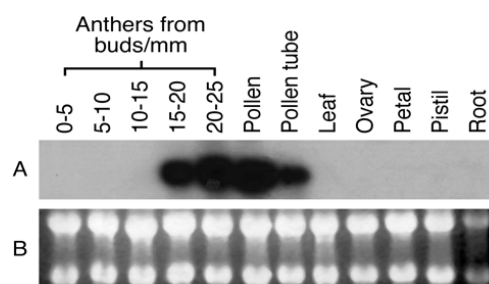

**Supplemental figure 1. Expression pattern of PiRhoGDI1**

(A) Autoradiograph of an RNA gel blot representing various tissues (as labeled), hybridized with PiRhoGDI1 cDNA. (B) Ethidium bromide staining of the gel used to generate the blot shown in (A), illustrating RNA loading (15 µg total RNA/lane). PiRhoGDI1 expression is first detectable in anthers 15-20 mm buds, rises to a peak in mature pollen and remains high in pollen tubes. Expression was not detected in other tissues.

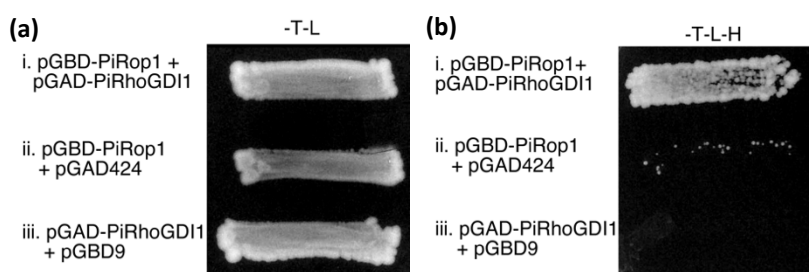

**Supplemental figure 2. PiRhoGDI1 interacts with PiRop1 in a yeast 2-hybrid assay** Yeast transformed with bait (pGBD) and prey (pGAD) constructs or empty vectors (as labeled), were grown on (a) media lacking tryptophan and leucine (plasmid selection), and (b) media lacking tryptophan, leucine and histidine, providing selection for both plasmids and interaction of fusion proteins). Only cells transformed with pGBD-PiCDPK1 and pGAD-PiRhoGDI1 were able to well on histidine selection, suggesting that the cDNAs encoded by these clones encode proteins that interact.

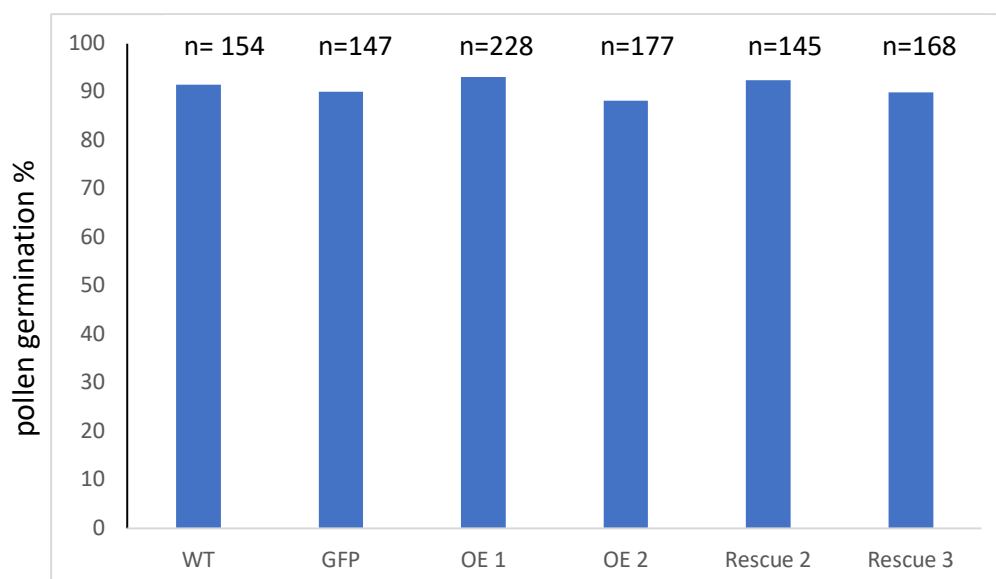

**Supplemental figure 3. In vitro pollen germination rates (%) of wild type and transgenic lines (as indicated).** N = number of pollen grains scored for each sample. Plant lines shown: WT (wild type), GFP (transformant expressing GFP alone), OE1 and OE2 (transgenic lines expressing PiCDPK1-GFP alone), Rescue 2 and Rescue 3 (transgenic lines expressing PiCDPK1-GFP and PiRhoGDI1).
